# Supplementary material
Source: PubMed Central journal article supplement (PMC4599711)
Supplement: NIHMS723708-supplement-supplement_1.pdf [file NIHMS723708-supplement-supplement_1.pdf]

**Supplemental Table 1 – Comparison of inflammatory and fibrostenotic phenotypes of EoE**

|                                                 | Inflammatory<br>(n = 134; 36%) | Any fibrostenosis*<br>(n = 240; 64%) | p <sup>†</sup> |
|-------------------------------------------------|--------------------------------|--------------------------------------|----------------|
| Age (mean years ± SD)                           | 13.3 ± 14.4                    | 32.3 ± 17.3                          | < 0.001        |
| Adults ≥ 18 years                               | 26 (19)                        | 173 (72)                             | < 0.001        |
| Males (n, %)                                    | 99 (74)                        | 174 (73)                             | 0.77           |
| Whites (n, %)                                   | 92 (69)                        | 210 (88)                             | < 0.001        |
| Symptoms (n, %)                                 |                                |                                      |                |
| Dysphagia                                       | 47 (36)                        | 193 (82)                             | < 0.001        |
| Food impaction                                  | 15 (12)                        | 83 (38)                              | < 0.001        |
| Heartburn                                       | 63 (49)                        | 75 (34)                              | 0.006          |
| Chest pain                                      | 8 (6)                          | 25 (11)                              | 0.11           |
| Abdominal pain                                  | 51 (39)                        | 32 (15)                              | < 0.001        |
| Nausea                                          | 20 (15)                        | 16 (7)                               | 0.02           |
| Vomiting                                        | 54 (41)                        | 33 (15)                              | < 0.001        |
| Failure to thrive                               | 33 (26)                        | 14 (6)                               | < 0.001        |
| Symptom length prior to dx<br>(mean years ± SD) | 5.3 ± 7.6                      | 8.4 ± 9.3                            | 0.005          |
| Atopic diseases (n, %)                          |                                |                                      |                |
| Allergic<br>rhinitis/sinusitis/dermatitis       | 50 (39)                        | 72 (33)                              | 0.29           |
| Asthma                                          | 35 (27)                        | 54 (25)                              | 0.67           |
| Food allergy                                    | 32 (27)                        | 29 (16)                              | 0.02           |
| Endoscopic findings (n, %)                      |                                |                                      |                |
| Normal                                          | 63 (47)                        | 0 (0)                                | -              |
| Rings                                           | 0                              | 148 (62)                             | -              |
| Stricture                                       | 0                              | 66 (28)                              | -              |
| Narrowing                                       | 0                              | 44 (18)                              | -              |
| Linear furrows                                  | 56 (42)                        | 94 (40)                              | -              |
| White plaques                                   | 39 (29)                        | 42 (18)                              | -              |
| Decreased vascularity                           | 25 (19)                        | 33 (14)                              | 0.21           |
| Crêpe-paper                                     | 7 (5)                          | 16 (7)                               | 0.58           |
| Erosive esophagitis                             | 14 (10)                        | 75 (31)                              | < 0.001        |
| Hiatal hernia                                   | 2 (1)                          | 33 (14)                              | < 0.001        |
| Dilation performed                              | 0                              | 76 (32)                              | -              |
| Max eosinophil count<br>(mean eos/hpf ± SD)     | 84.2 ± 75.9                    | 86.7 ± 84.7                          | 0.78           |

\* Any fibrostenosis was defined by the presence of esophageal rings, narrowing, or strictures, regardless of whether there were also inflammatory findings present.

† p values calculated using a one-way ANOVA for continuous variables and chi-square for categorical variables; p values were not compared for the endoscopic findings used to construct the phenotype groups.

**Supplemental Table 2 – Comparison of EoE characteristics by atopic status**

|                                                 | Not atopic<br>(n = 155; 47%) | Atopic<br>(n = 177; 53%) | p*   |
|-------------------------------------------------|------------------------------|--------------------------|------|
| Age (mean years ± SD)                           | 26.1 ± 19.6                  | 22.3 ± 17.7              | 0.06 |
| Adults ≥ 18 years                               | 85 (55)                      | 80 (45)                  | 0.08 |
| Males (n, %)                                    | 118 (76)                     | 126 (72)                 | 0.31 |
| Whites (n, %)                                   | 127 (82)                     | 140 (80)                 | 0.58 |
| Symptoms (n, %)                                 |                              |                          |      |
| Dysphagia                                       | 89 (58)                      | 117 (67)                 | 0.08 |
| Food impaction                                  | 42 (27)                      | 50 (29)                  | 0.69 |
| Heartburn                                       | 52 (34)                      | 76 (44)                  | 0.05 |
| Chest pain                                      | 12 (8)                       | 17 (10)                  | 0.50 |
| Abdominal pain                                  | 35 (23)                      | 40 (23)                  | 0.91 |
| Nausea                                          | 17 (11)                      | 17 (10)                  | 0.75 |
| Vomiting                                        | 39 (25)                      | 47 (27)                  | 0.68 |
| Failure to thrive                               | 19 (12)                      | 29 (17)                  | 0.25 |
| Symptom length prior to dx<br>(mean years ± SD) | 7.4 ± 9.6                    | 6.9 ± 8.2                | 0.62 |
| Atopic diseases (n, %)                          |                              |                          |      |
| Allergic rhinitis,<br>sinusitis, dermatitis     | -                            | 125 (71)                 | --   |
| Asthma                                          | -                            | 89 (51)                  | --   |
| Food allergy                                    | -                            | 62 (42)                  | --   |
| Endoscopic findings (n, %)                      |                              |                          |      |
| Normal                                          | 28 (18)                      | 30 (17)                  | 0.84 |
| Rings                                           | 60 (39)                      | 67 (39)                  | 0.97 |
| Stricture                                       | 29 (19)                      | 22 (13)                  | 0.13 |
| Narrowing                                       | 13 (8)                       | 27 (16)                  | 0.05 |
| Linear furrows                                  | 59 (38)                      | 79 (46)                  | 0.18 |
| White plaques                                   | 34 (22)                      | 44 (25)                  | 0.48 |
| Decreased vascularity                           | 22 (14)                      | 32 (19)                  | 0.31 |
| Crêpe-paper                                     | 10 (6)                       | 11 (6)                   | 0.96 |
| Erosive esophagitis                             | 36 (23)                      | 40 (23)                  | 0.96 |
| Hiatal hernia                                   | 16 (10)                      | 14 (8)                   | 0.46 |
| Dilation performed                              | 36 (24)                      | 24 (14)                  | 0.02 |
| Max eosinophil count<br>(mean eos/hpf ± SD)     | 80.7 ± 76.8                  | 85.5 ± 79.3              | 0.58 |

\* p values calculated using a t-test for continuous variables and chi-square for categorical variables.

**Supplemental Table 3 – Comparison of EoE features by level of esophageal eosinophilia**

|                                                 | Eos/hpf = 15-50<br>(n = 117; 31%) | Eos/hpf = 51-99<br>(n = 134; 35%) | Eos/hpf ≥ 100<br>(n = 128; 34%) | p*   |
|-------------------------------------------------|-----------------------------------|-----------------------------------|---------------------------------|------|
| Age (mean years ± SD)                           | 27.5 ± 20.4                       | 25.5 ± 18.5                       | 23.1 ± 17.0                     | 0.14 |
| Adults ≥ 18 years                               | 66 (56)                           | 71 (53)                           | 62 (48)                         | 0.45 |
| Males (n, %)                                    | 85 (73)                           | 102 (77)                          | 90 (70)                         | 0.50 |
| Whites (n, %)                                   | 94 (81)                           | 105 (79)                          | 105 (82)                        | 0.81 |
| Symptoms (n, %)                                 |                                   |                                   |                                 |      |
| Dysphagia                                       | 72 (62)                           | 83 (65)                           | 88 (69)                         | 0.49 |
| Food impaction                                  | 25 (23)                           | 37 (30)                           | 37 (31)                         | 0.29 |
| Heartburn                                       | 49 (44)                           | 43 (35)                           | 37 (37)                         | 0.36 |
| Chest pain                                      | 13 (12)                           | 12 (10)                           | 8 (7)                           | 0.43 |
| Abdominal pain                                  | 28 (25)                           | 25 (20)                           | 30 (25)                         | 0.61 |
| Nausea                                          | 8 (7)                             | 12 (10)                           | 18 (15)                         | 0.13 |
| Vomiting                                        | 32 (29)                           | 28 (23)                           | 31 (26)                         | 0.57 |
| Failure to thrive                               | 19 (17)                           | 15 (12)                           | 15 (13)                         | 0.51 |
| Symptom length prior to dx<br>(mean years ± SD) | 9.0 ± 11.9                        | 6.3 ± 6.7                         | 5.9 ± 6.2                       | 0.04 |
| Atopic diseases (n, %)                          |                                   |                                   |                                 |      |
| Allergic rhinitis, sinusitis,<br>dermatitis     | 39 (35)                           | 48 (39)                           | 38 (33)                         | 0.63 |
| Asthma                                          | 25 (23)                           | 32 (26)                           | 32 (28)                         | 0.70 |
| Food allergy                                    | 20 (20)                           | 21 (20)                           | 21 (21)                         | 0.96 |
| Endoscopic findings (n, %)                      |                                   |                                   |                                 |      |
| Normal                                          | 20 (17)                           | 26 (20)                           | 17 (14)                         | 0.42 |
| Rings                                           | 51 (44)                           | 49 (37)                           | 48 (38)                         | 0.51 |
| Stricture                                       | 20 (17)                           | 17 (13)                           | 29 (23)                         | 0.09 |
| Narrowing                                       | 14 (12)                           | 13 (10)                           | 17 (14)                         | 0.64 |
| Linear furrows                                  | 48 (41)                           | 56 (42)                           | 45 (36)                         | 0.54 |
| White plaques                                   | 20 (17)                           | 33 (25)                           | 28 (22)                         | 0.33 |
| Decreased vascularity                           | 22 (19)                           | 22 (17)                           | 14 (11)                         | 0.23 |
| Crêpe-paper                                     | 11 (9)                            | 7 (5)                             | 5 (4)                           | 0.18 |
| Erosive esophagitis                             | 27 (23)                           | 23 (17)                           | 38 (30)                         | 0.05 |
| Hiatal hernia                                   | 15 (13)                           | 13 (10)                           | 7 (6)                           | 0.14 |
| Dilation performed                              | 28 (25)                           | 22 (17)                           | 26 (21)                         | 0.32 |
| Max eosinophil count<br>(mean eos/hpf ± SD)     | 29.6 ± 10.2                       | 64.1 ± 12.1                       | 159.3 ± 102.0                   | --   |

\* p values calculated using ANOVA for continuous variables and chi-square for categorical variables.

**Supplemental Table 4 – EoE characteristics by pediatric versus adult onset of disease\***

|                                                 | Peds. onset<br>(n = 172; 45%) | Adult onset<br>(n = 207; 55%) | p <sup>†</sup> |
|-------------------------------------------------|-------------------------------|-------------------------------|----------------|
| Age (mean years ± SD)                           | 9.0 ± 8.1                     | 33.7 ± 16.9                   | --             |
| Males (n, %)                                    | 104 (81)                      | 174 (70)                      | 0.02           |
| Whites (n, %)                                   | 88 (68)                       | 217 (87)                      | < 0.001        |
| Symptoms (n, %)                                 |                               |                               |                |
| Dysphagia                                       | 46 (37)                       | 198 (80)                      | < 0.001        |
| Food impaction                                  | 19 (15)                       | 81 (35)                       | < 0.001        |
| Heartburn                                       | 58 (46)                       | 81 (35)                       | 0.05           |
| Chest pain                                      | 4 (3)                         | 29 (13)                       | 0.003          |
| Abdominal pain                                  | 37 (29)                       | 46 (20)                       | 0.05           |
| Nausea                                          | 13 (10)                       | 25 (11)                       | 0.86           |
| Vomiting                                        | 55 (44)                       | 36 (16)                       | < 0.001        |
| Failure to thrive                               | 39 (31)                       | 10 (4)                        | < 0.001        |
| Symptom length prior to dx<br>(mean years ± SD) | 5.5 ± 6.4                     | 8.5 ± 10.3                    | 0.004          |
| Atopic diseases (n, %)                          |                               |                               |                |
| Allergic rhinitis/sinusitis/dermatitis          | 51 (41)                       | 74 (33)                       | 0.11           |
| Asthma                                          | 35 (28)                       | 54 (24)                       | 0.35           |
| Food allergy                                    | 31 (28)                       | 31 (16)                       | 0.01           |
| Endoscopic findings (n, %)                      |                               |                               |                |
| Normal                                          | 42 (33)                       | 21 (9)                        | < 0.001        |
| Rings                                           | 11 (9)                        | 137 (55)                      | < 0.001        |
| Stricture                                       | 6 (5)                         | 60 (24)                       | < 0.001        |
| Narrowing                                       | 5 (4)                         | 39 (16)                       | < 0.001        |
| Linear furrows                                  | 38 (30)                       | 112 (45)                      | 0.004          |
| White plaques                                   | 29 (23)                       | 52 (21)                       | 0.69           |
| Decreased vascularity                           | 30 (24)                       | 28 (11)                       | 0.002          |
| Crêpe-paper                                     | 9 (7)                         | 14 (5)                        | 0.59           |
| Erosive esophagitis                             | 29 (23)                       | 60 (24)                       | 0.75           |
| Hiatal hernia                                   | 2 (2)                         | 33 (13)                       | < 0.001        |
| Dilation performed                              | 6 (5)                         | 70 (29)                       | < 0.001        |
| Max eosinophil count<br>(mean eos/hpf ± SD)     | 83.1 ± 67.9                   | 86.9 ± 87.2                   | 0.67           |

\* Adult status now defined as any subject ≥ 12 years old, and pediatric status defined as < 12 years old.

† p values calculated using a t-test for continuous variables and chi-square for categorical variables.
